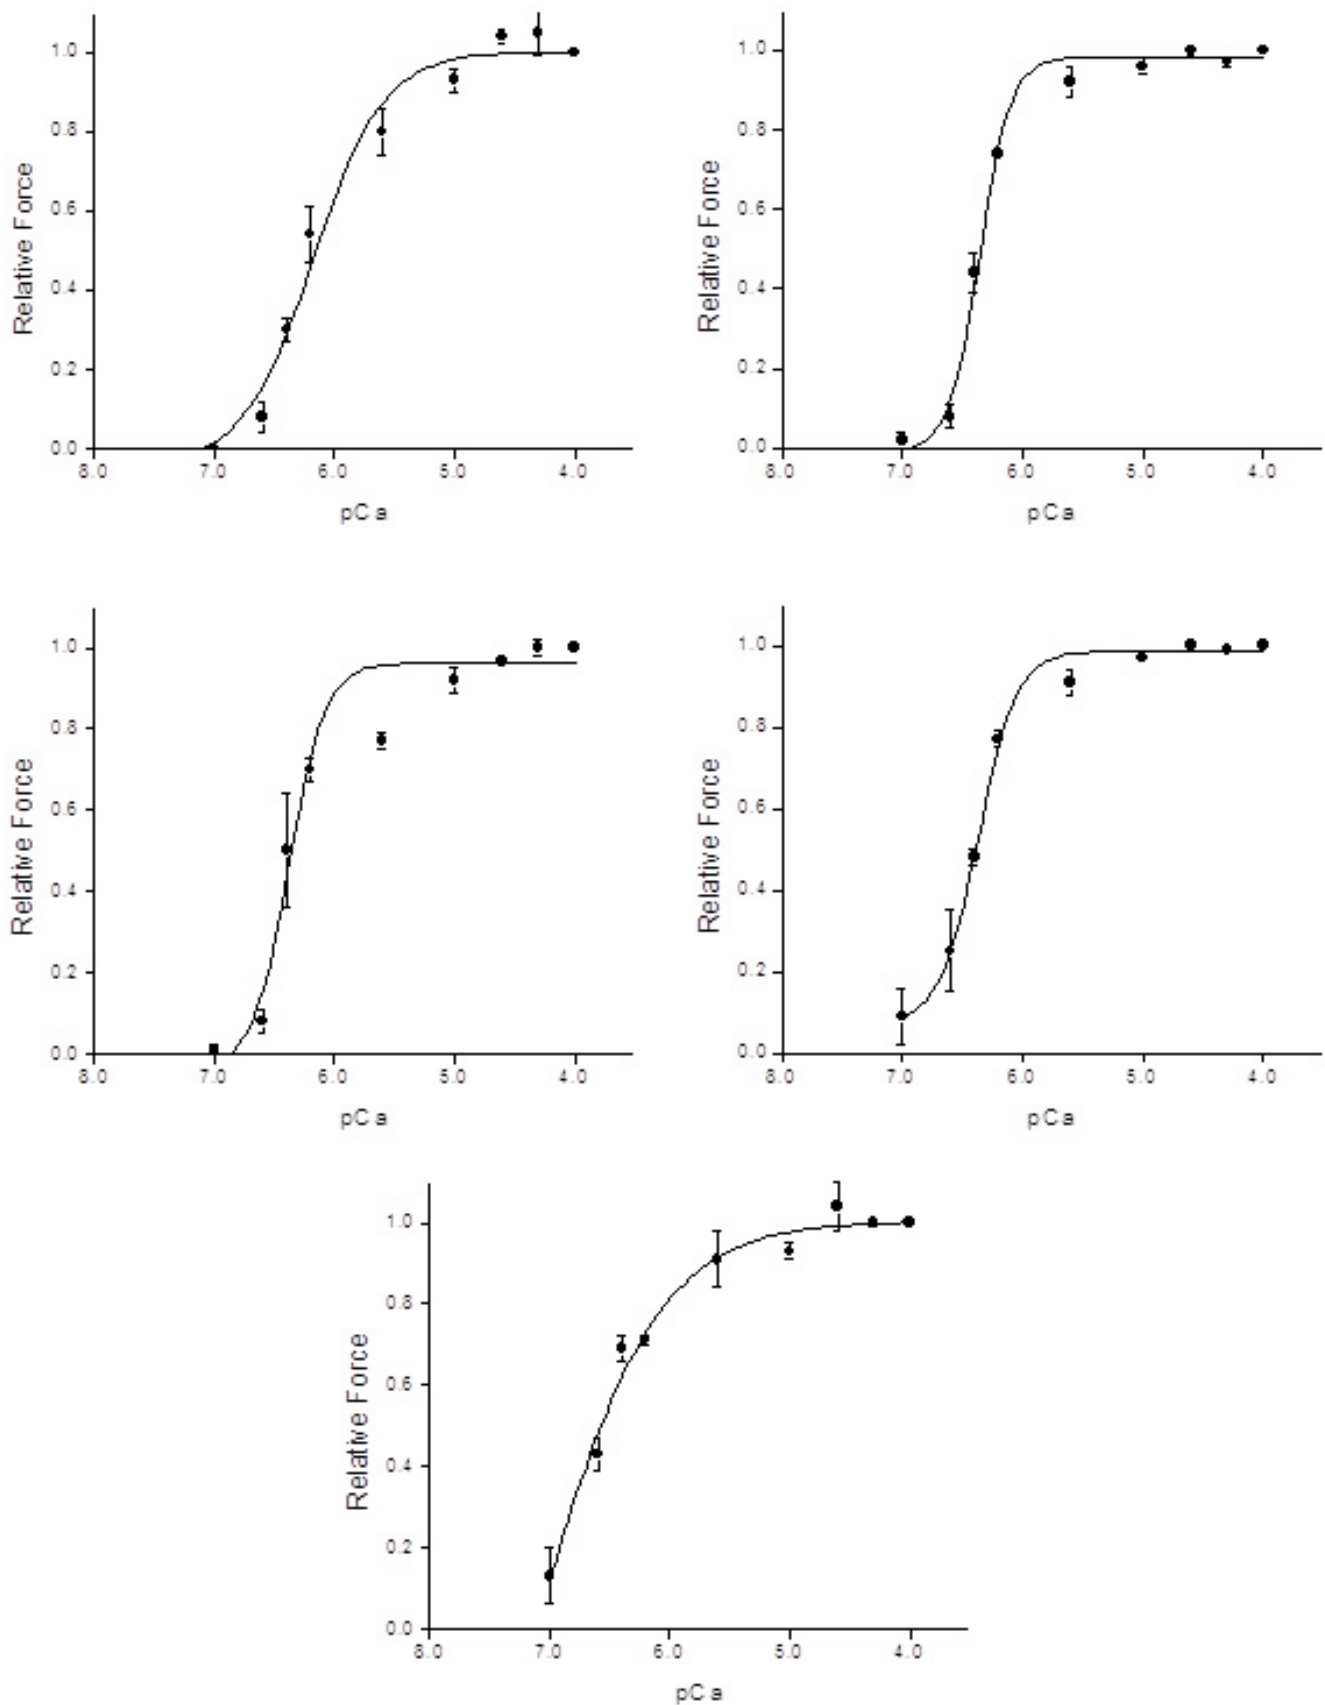

**Fig. S1.** Force/pCa relationships in fibers from hummingbird pectoralis (top left), hummingbird leg muscle (top right), finch pectoralis (middle left), finch leg muscle (middle right) and sparrow pectoralis (bottom). Each point represents the mean  $\pm$  s.e.m. Peak force generated during each submaximal, from pCa 4.3 to 7.0, was normalized by the peak force generated during the temporally neighboring activation in pCa 4.0 solution (see Materials and methods for details).
